# Supplementary material
Source: PubMed Central journal article supplement (PMC5461088)
Supplement: CEI-189-120-s001.pdf [file CEI-189-120-s001.pdf]

**Full title: The identification of upregulated ebv-mir-BHRF1-2-5p targeting MALT1 and ebv-miR-BHRF1-3 in the circulation of patients with multiple sclerosis**

**Yifei Wang<sup>1+</sup>, Dandan He<sup>1+</sup>, Hongwei Liang<sup>2</sup>, Dan Yang<sup>1</sup>, Hui Yue<sup>1</sup>, Xuemei Zhang<sup>1</sup>, Rui Wang<sup>1</sup>, Bing Li<sup>1</sup>, Hongxia Yang<sup>1</sup>, Yuan Liu<sup>1</sup>, Yao Chen<sup>1</sup>, Yuxiao Duan<sup>1</sup>, ChenYu Zhang<sup>2</sup>, Xi Chen<sup>2\*</sup>; Jin Fu<sup>1\*</sup>**

<sup>1</sup>Department of Neurology, the Second Affiliated Hospital of Harbin Medical University, Harbin Medical University, Harbin, 150086, China, <sup>2</sup>Jiangsu Engineering Research Center for microRNA Biology and Biotechnology, State Key Laboratory of Pharmaceutical Biotechnology, Nanjing Advanced Institute for Life Sciences(NAILS), Nanjing University School of Life Sciences, Nanjing, 210093, China

<sup>+</sup>These authors contributed equally to this work.

\* Correspondence to E-mail: fujin0612@126.com (Jin Fu); xichen@nju.edu.cn (Xi Chen).

| <b>ebv-miR</b> | <b>Mature miRNA Sequence</b> | <b>Catalog number</b> | <b>Product number</b> |
|----------------|------------------------------|-----------------------|-----------------------|
| BHRF1-1        | UAACCUGAUCAGCCCCGGAGUU       | Cat. #4427975         | 007757                |
| BHRF1-2-3p     | AAAUUCUGUUGCAGCAGAUAGC       | Cat. #4427975         | 197239_mat            |
| BHRF1-2-5p     | AAAUUCUGUUGCAGCAGAUAGC       | Cat. #4427975         | 006088                |
| BHRF 1-3       | UAACGGGAAGUGUGUAAGCACA       | Cat. #4427975         | 197221_mat            |
| BART 3-5p      | ACCUAGUGUUAGUGUUGUGCU        | Cat. #4427975         | 004432_mat            |
| BART 3-3p      | CGCACCACUAGUCACCAGGUGU       | Cat. #4427975         | 004578_mat            |
| BART 4-5p      | GACCUGAUGCUGCUGGUGUGCU       | Cat. #4427975         | 005623                |
| BART 4-3p      | CACAUACGUAGGCACCAGGUGU       | Cat. #4427975         | 007411                |
| BART 1-5p      | UCUUAGUGGAAGUGACGUGCUGUG     | Cat. #4427975         | 197199_mat            |
| BART 1-3p      | UAGCACCGCUAUCCACUAUGUC       | Cat. #4427975         | 464048_mat            |
| BART 2-5p      | UAUUUUCUGCAUUCGCCUUGC        | Cat. #4427975         | 197238_mat            |
| BART 2-3p      | AAGGAGCGAUUUGGAGAAAAUAAA     | Cat. #4427975         | 006174                |
| BART 5-5P      | CAAGGUGAAUAUAGCUGCCCAUCG     | Cat. #4427975         | 197237_mat            |
| BART 5-3p      | GUGGGCCGCUGUUCACCU           | Cat. #4427975         | 006342                |
| BART 6-5p      | UAAGGUUGGUCCAUCCAUAGG        | Cat. #4427975         | 005531                |
| BART 6-3p      | CGGGGAUCGGACUAGCCUAGA        | Cat. #4427975         | 008317                |
| BART 7-5P      | CCUGGACCUUGACUAUGAAACA       | Cat. # 4464084        | MH12664               |
| BART 7-3P      | CAUCAUAGUCCAGUGUCCAGGG       | Cat. # 4464084        | MC11560               |
| BART 8-5p      | UACGGUUUCCUAGAUUGUACAG       | Cat. #4427975         | 008211                |
| BART 8-3p      | GUCACAAUCUAUGGGGUCGUAGA      | Cat. #4427975         | 197196_mat            |
| BART 9-5P      | UACUGGACCCUGAAUUGGAAAC       | Cat. #4427975         | 006884                |
| BART 9-3p      | U AACACUUCAUGGGUCCCGUAGU     | Cat. #4427975         | 007435                |
| BART 10-5P     | GCCACCUCUUUGGUUCUGUACA       | Cat. #4464084         | MH12964               |
| BART 10-3p     | UACAUAACCAUGGAGUUGGCUGU      | Cat. #4427975         | 004421_mat            |
| BART 11-5p     | UCAGACAGUUUGGUGCGCUAGUUG     | Cat. #4427975         | 005755                |
| BART 11-3p     | ACGCACACCAGGCUGACUGCC        | Cat. #4427975         | 197210_mat            |
| BART 12        | UCCUGUGGUGUUUGGUGUGGUU       | Cat. #4427975         | 005725                |
| BART 13-5p     | AACCGGCUCGUGGCUCGUACAG       | Cat. #4427975         | 006990                |
| BART 13-3p     | UGUAACUUGCCAGGGACGGCUGA      | Cat. #4427975         | 005446                |
| BART 14-5p     | UACCCUACGCUGCCGAUUUACA       | Cat. #4427975         | 005811                |
| BART 14-3p     | UAAAUGCUGCAGUAGUAGGGAU       | Cat. #4427975         | 006386                |
| BART 15        | GUCAGUGGUUUUGUUCCUUGA        | Cat. #4427975         | 005699                |
| BART 16        | UUAGAUAGAGUGGGUGUGUGCUCU     | Cat. #4427975         | 006319                |
| BART 17-5p     | UAAGAGGACGCAGGCAUACAAG       | Cat. #4427975         | 008216                |
| BART 17-3p     | UGUAUGCCUGGUGUCCCUUAGU       | Cat. #4427975         | 008119                |
| BART 18-5p     | UCAAGUUCGCACUCCUAUACA        | Cat. #4427975         | 008081                |
| BART 18-3p     | UAUCGGAAGUUUGGGCUUCGUC       | Cat. #4427975         | 008473                |
| BART 19-5p     | ACAUUCCCCGCAAACAUGACAUG      | Cat. #4427975         | 006693                |
| BART 19-3p     | UUUUGUUUGCUUGGGAAUGCU        | Cat. #4427975         | 197235_mat            |
| BART 20-5p     | UAGCAGGCAUGUCUUCAUUCC        | Cat. #4427975         | 006851                |
| BART 20-3p     | CAUGAAGGCACAGCCUGUUACC       | Cat. #4427975         | 007226                |
| BART 21-5p     | UCACUAGUGAAGGCAACUAAC        | Cat. #4427975         | 006882                |

|            |                         |               |        |
|------------|-------------------------|---------------|--------|
| BART 21-3p | CUAGUUGUGCCCACUGGUGUUU  | Cat. #4427975 | 006186 |
| BART 22    | UUACAAAGUCAUGGUCUAGUAGU | Cat. #4427975 | 006609 |

---

**Supplementary Table S1.** The mature miRNA sequence and product/catalog numbers of all tested miRNAs.

| miRNA<br>name | Control    |         | MS         |        | adjusted<br>p value | water<br>background<br>Ct |
|---------------|------------|---------|------------|--------|---------------------|---------------------------|
|               | Average Ct | SEM     | Average Ct | SEM    |                     |                           |
| bhrf1-1       | 27.4321    | 0.3749  | 27.3292    | 0.4504 | 0.8217              | 32.2295                   |
| bhrf1-2-3p    | 34.9686    | 0.1418  | 35.3638    | 0.1954 | 0.9351              | 40                        |
| bart1-3p      | 30.5879    | 0.1426  | 30.7562    | 0.323  | 0.9325              | 40                        |
| bart2-3p      | 31.3632    | 0.2872  | 31.4097    | 0.2178 | 0.7525              | 40                        |
| bart2-5p      | 26.0385    | 0.2548  | 26.191     | 0.4488 | 0.7692              | 33.8206                   |
| bart3-3p      | 27.6905    | 0.5145  | 27.8133    | 0.6908 | 0.6798              | 35.1726                   |
| bart5-3p      | 28.7077    | 0.3     | 28.3766    | 0.2126 | 0.2438              | 40                        |
| bart6-5p      | 28.9974    | 0.1752  | 29.0608    | 0.3598 | 0.6684              | 40                        |
| bart8-3p      | 29.4861    | 0.4638  | 28.8701    | 0.5632 | 0.3185              | 39.3245                   |
| bart8-5p      | 31.2471    | 0.2152  | 32.3561    | 0.3646 | 0.1201              | 40                        |
| bart9-3p      | 24.3217    | 0.1479  | 24.4299    | 0.3582 | 0.6702              | 36.3382                   |
| bart10-3p     | 29.1566    | 0.353   | 28.8529    | 0.3475 | 0.929               | 36.4602                   |
| bart11-3p     | 32.1987    | 0.2754  | 31.677     | 0.4098 | 0.0922              | 40                        |
| bart11-5p     | 28.4101    | 0.1157  | 28.1962    | 0.3101 | 0.2272              | 38.5273                   |
| bart15        | 32.0017    | 0.1703  | 31.9169    | 0.2085 | 0.3484              | 40                        |
| bart17-3p     | 25.9655    | 0.3221  | 25.6794    | 0.2381 | 0.2177              | 38.7142                   |
| bart20-3p     | 30.8304    | 0.21    | 30.761     | 0.5056 | 0.5037              | 40                        |
| bart20-5p     | 29.2643    | 0.1434  | 29.9694    | 0.351  | 0.3737              | 40                        |
| bhrf1-2-5p    | 28.1149    | 0.08137 | 27.5873    | 0.1176 | 0.005               | 38.8425                   |
| bhrf1-3       | 25.5054    | 0.07167 | 25.0871    | 0.0934 | 0.004               | 40                        |
| U6snRNA       | 27.9028    | 0.10367 | 27.8636    | 0.2036 | 0.86                | 40                        |

**Supplementary Table S2.** Average Ct values (with SEM) of 20 robustly expressed (average Ct<35 and distinguishable from water background) EBV miRNAs and U6snRNA in the sera of healthy controls and multiple sclerosis (MS) patients. P values were the Student's t test results comparing adjusted Ct values of the two groups.
